# Supplementary material
Source: publisher figshare collection journal article supplement (https://acs.figshare.com/ndownloader/files/4399180)
Supplement: Supplementary file 1 [file 4399180]

# Supporting Information for “Mechanism of Cellular Uptake of Highly Fluorescent Conjugated Polymer Nanoparticles”

*Lawrence P. Fernando, Prakash Kandel, Jiangbo Yu, Jason McNeill, P. Christine, Ackroyd, and  
Kenneth A. Christensen\**

Department of Chemistry, Clemson University, Clemson, SC 29634

\*Corresponding Author

## **SUPPORTING INFORMATION EXPERIMENTAL**

**Absorbance and fluorescence emission spectra.** Absorbance spectra of PFBT nanoparticle solutions were acquired using a Genesys 10UV (Thermo) spectrophotometer which has spectral resolution of 5 nm. Solutions were diluted to below 0.5 absorbance units in quartz cuvettes prior to measuring absorbance and below 0.05 absorbance units for fluorescence measurements. Fluorescence emission spectra were acquired using a scanning fluorometer (Photon Technology International; QM-4) with 75 W Xe arc lamp excitation and photon counting detection. Both excitation and emission monochromator slits were set to achieve an 8 nm band pass.

**Phalloidin staining of actin filaments.** Cells were plated at 100K/dish in glass bottom dishes and incubated with 2 nM PFBT nanoparticles for 8 h or vehicle alone as a control. The cells were fixed at 37°C with 4% paraformaldehyde in RB for 10 minutes then washed 3X in RB. Next, the cells were permeabilized for 3-5 min in RB + 0.1% Triton-X. Two (2) units of Alexa fluor 594 phalloidin was added to the cells for 20-30 min in RB + 1% BSA and finally washed 3X with this same buffer and images acquired on the microscope.

## SUPPORTING INFORMATION FIGURES

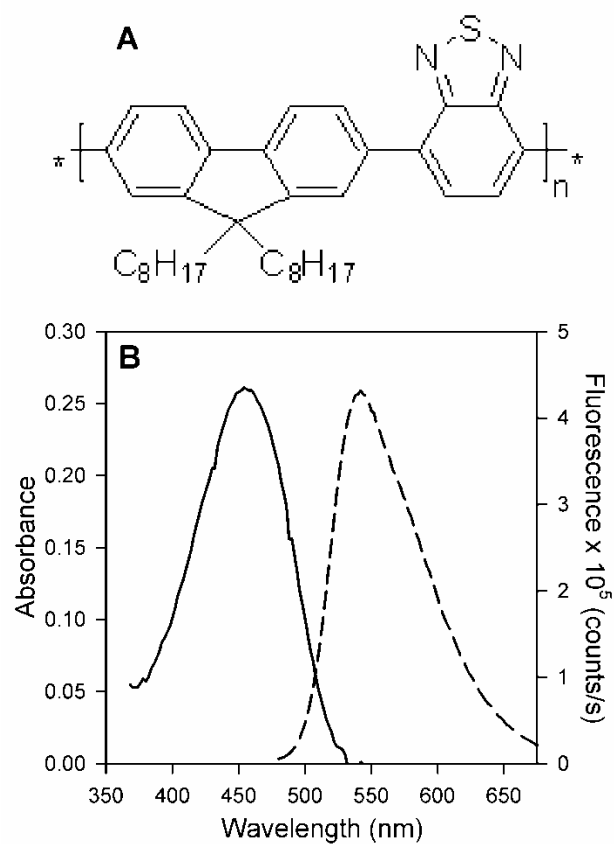

**Figure S1 A) Chemical structure of PFBT. B) Absorbance spectrum and fluorescence emission spectrum of PFBT nanoparticles.** An absorbance spectrum (solid line) was acquired using a ~4 nM solution of PFBT nanoparticles in water. A fluorescence emission spectrum (dashed line) was acquired using a ~300 pM solution of PFBT nanoparticles in water ( $\lambda_{ex} = 460$  nm). The fluorescence emission was recorded from 480 – 700 nm.

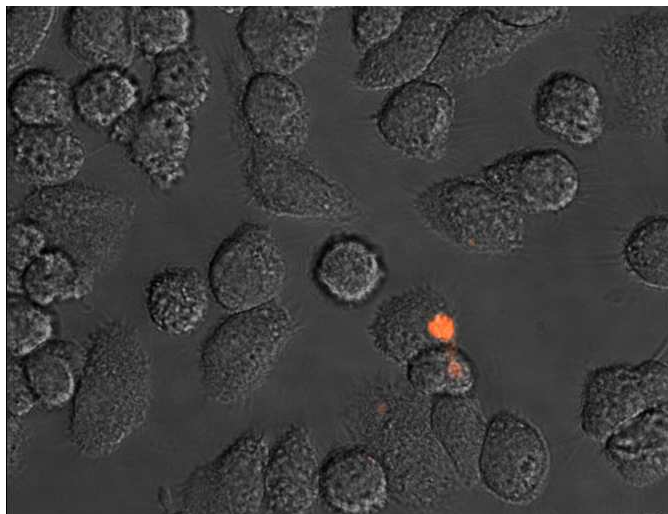

**Figure S2 Cell viability after 8 h incubation on ice.** An image overlay of DIC and propidium iodide (PI) fluorescence for cells following an 8 h incubation on ice. Cell morphology is normal for J774A.1 cells and only 1 cell in the microscope field shows strong nuclear staining with PI which only stains dead cells. All images were acquired at 37°C using a 60X/1.45NA objective. PI fluorescence measured using ( $\lambda_{\text{ex}} = 494 \text{ nm}/\lambda_{\text{em}} = 624 \text{ nm}$ ).

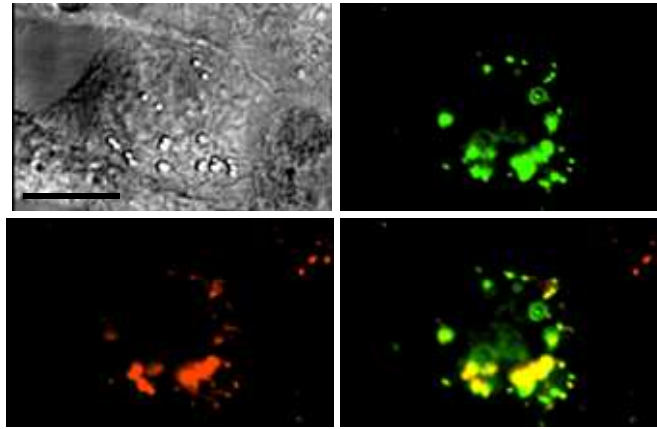

**Figure S3 Colocalization of PFBT nanoparticles with TR-dex.** CHO-K1 cells were grown in 35 mm glass bottom dishes as indicated in materials and methods. Cells were pulsed with 2 nM (4 ppm) PFBT nanoparticles and 250 nM TR-dex overnight in DMEM + 10% FBS at 37°C and 5% CO<sub>2</sub> then washed 3X in RB prior to imaging. All images were acquired at 37°C using a 60X/1.45NA objective. A) DIC (Scale bar = 10 μm); B) PFBT nanoparticle fluorescence ( $\lambda_{\text{ex}} = 494 \text{ nm}/\lambda_{\text{em}} = 531 \text{ nm}$ ); C) TR-dex fluorescence ( $\lambda_{\text{ex}} = 575 \text{ nm}/\lambda_{\text{em}} = 624 \text{ nm}$ ); D) Merged image; yellow color indicates probable colocalization.

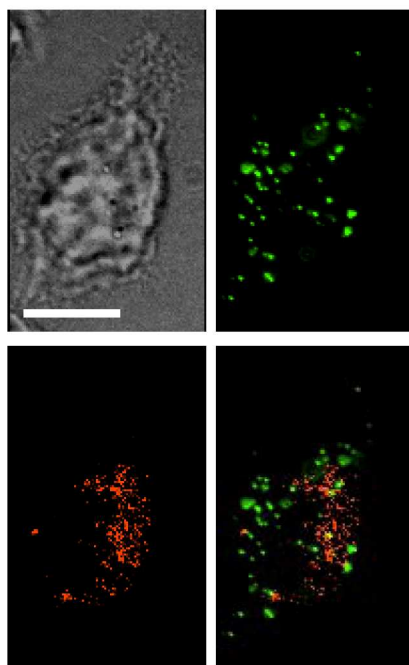

**Figure S4 No Observed Colocalization of PFBT nanoparticles with Clathrin Heavy Chain.** Cells were pulsed with 2 nM PFBT nanoparticles for 2 hours in DMEM + 10% FBS at 37°C and 5% CO<sub>2</sub> then immediately paraformaldehyde fixed, detergent permeabilized, and stained with an anti-clathrin heavy chain primary antibody followed by labeling with a Cy5 secondary Fab conjugate. Images were all acquired at room temperature using a 60X/1.45NA objective. A) DIC (Scale bar = 10  $\mu$ m); B) PFBT nanoparticle fluorescence ( $\lambda_{\text{ex}}$  = 494 nm/ $\lambda_{\text{em}}$  = 531 nm); C) Cy5 (anti-clathrin heavy chain) fluorescence ( $\lambda_{\text{ex}}$  = 575 nm/ $\lambda_{\text{em}}$  = 624 nm); D) Merged image; yellow color indicates no observable colocalization.

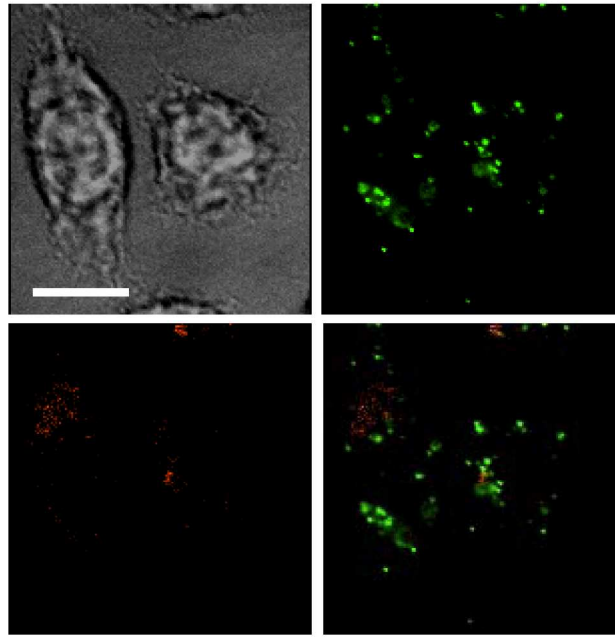

**Figure S5 No Observed Colocalization of PFBT nanoparticles with Caveolin-1.** Cells were pulsed with 2 nM PFBT nanoparticles for 2 hours in DMEM + 10% FBS at 37°C and 5% CO<sub>2</sub> then immediately paraformaldehyde fixed, detergent permeabilized, and stained with an anti-caveolin-1 primary antibody followed by labeling with a Cy5 secondary Fab conjugate. Images were all acquired at room temperature using a 60X/1.45NA objective. A) DIC (Scale bar = 10  $\mu$ m); B) PFBT nanoparticle fluorescence ( $\lambda_{\text{ex}}$  = 494 nm/ $\lambda_{\text{em}}$  = 531 nm); C) Cy5 (anti-caveolin-1) fluorescence ( $\lambda_{\text{ex}}$  = 575 nm/ $\lambda_{\text{em}}$  = 624 nm); D) Merged image; yellow color indicates no observable colocalization.

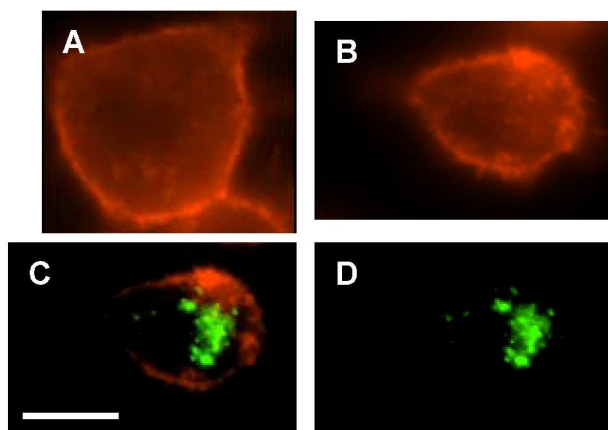

**Figure S6 Normal actin filament distribution observed for cells treated with PFBT nanoparticles.** Cells were pulsed with 2 nM PFBT nanoparticles for 8 hours in DMEM + 10% FBS at 37°C and 5% CO<sub>2</sub>. Cells were then paraformaldehyde fixed, detergent permeabilized, and stained 2 units of Alexa fluor phalloidin. Images were all acquired at room temperature using a 60X/1.45NA objective. A) Alexa fluor 594 phalloidin (actin) fluorescence ( $\lambda_{\text{ex}} = 575 \text{ nm}/\lambda_{\text{em}} = 624 \text{ nm}$ ; scale bar = 10  $\mu\text{m}$ ) for cells *not treated* with nanoparticles; B) Alexa fluor 594 phalloidin (actin) fluorescence ( $\lambda_{\text{ex}} = 575 \text{ nm}/\lambda_{\text{em}} = 624 \text{ nm}$ ; scale bar = 10  $\mu\text{m}$ ) for cells *treated* with PFBT nanoparticles; C) Merged image; no observed differences between cells treated with nanoparticles and the untreated control; D) PFBT nanoparticle fluorescence ( $\lambda_{\text{ex}} = 494 \text{ nm}/\lambda_{\text{em}} = 531 \text{ nm}$ ).
